# Supplementary material for: Risk Assessment for Birth Defects in Offspring of Chinese Pregnant Women
Source: MDPI journal article supplement (doi:10.3390/ijerph19148584), 2022-07-14
Supplement: s1 [file s1]

**Supplementary Table S1.** Prevalence of birth defects in the survey (per 10,000).

|                              | Training group<br>(n=15,723) | Validation group<br>(n=13,481) | Total<br>(n =29,204) | Proportion<br>(n =562) |
|------------------------------|------------------------------|--------------------------------|----------------------|------------------------|
| Cardiovascular system defect | 94 (59.79)                   | 91 (67.50)                     | 185 (63.35)          | 32.92%                 |
| Musculoskeletal system       | 61 (38.80)                   | 40 (29.67)                     | 101 (34.58)          | 17.97%                 |
| Eye, ear, face and neck      | 46 (29.26)                   | 24 (17.80)                     | 70 (23.97)           | 12.46%                 |
| Oral clefts                  | 15 (9.54)                    | 19 (14.09)                     | 34 (11.64)           | 6.05%                  |
| Digestive system             | 13 (8.27)                    | 12 (8.90)                      | 25 (8.56)            | 4.45%                  |
| Nervous system               | 10 (6.36)                    | 10 (7.42)                      | 20 (6.85)            | 3.56%                  |
| Genital organs               | 10 (6.36)                    | 7 (5.19)                       | 17 (5.82)            | 3.02%                  |
| Respiratory system           | 8 (5.09)                     | 3 (2.23)                       | 11 (3.77)            | 1.96%                  |
| Urinary system               | 2 (1.27)                     | 4 (2.97)                       | 6 (2.05)             | 1.07%                  |
| Chromosomal abnormalities    | 2 (1.27)                     | 0 (0.00)                       | 2 (0.68)             | 0.36%                  |
| Other defects                | 65 (41.34)                   | 26 (19.29)                     | 91 (31.16)           | 16.19%                 |
| Total birth defects          | 326 (207.34)                 | 236 (175.060)                  | 562 (192.44)         | 100%                   |

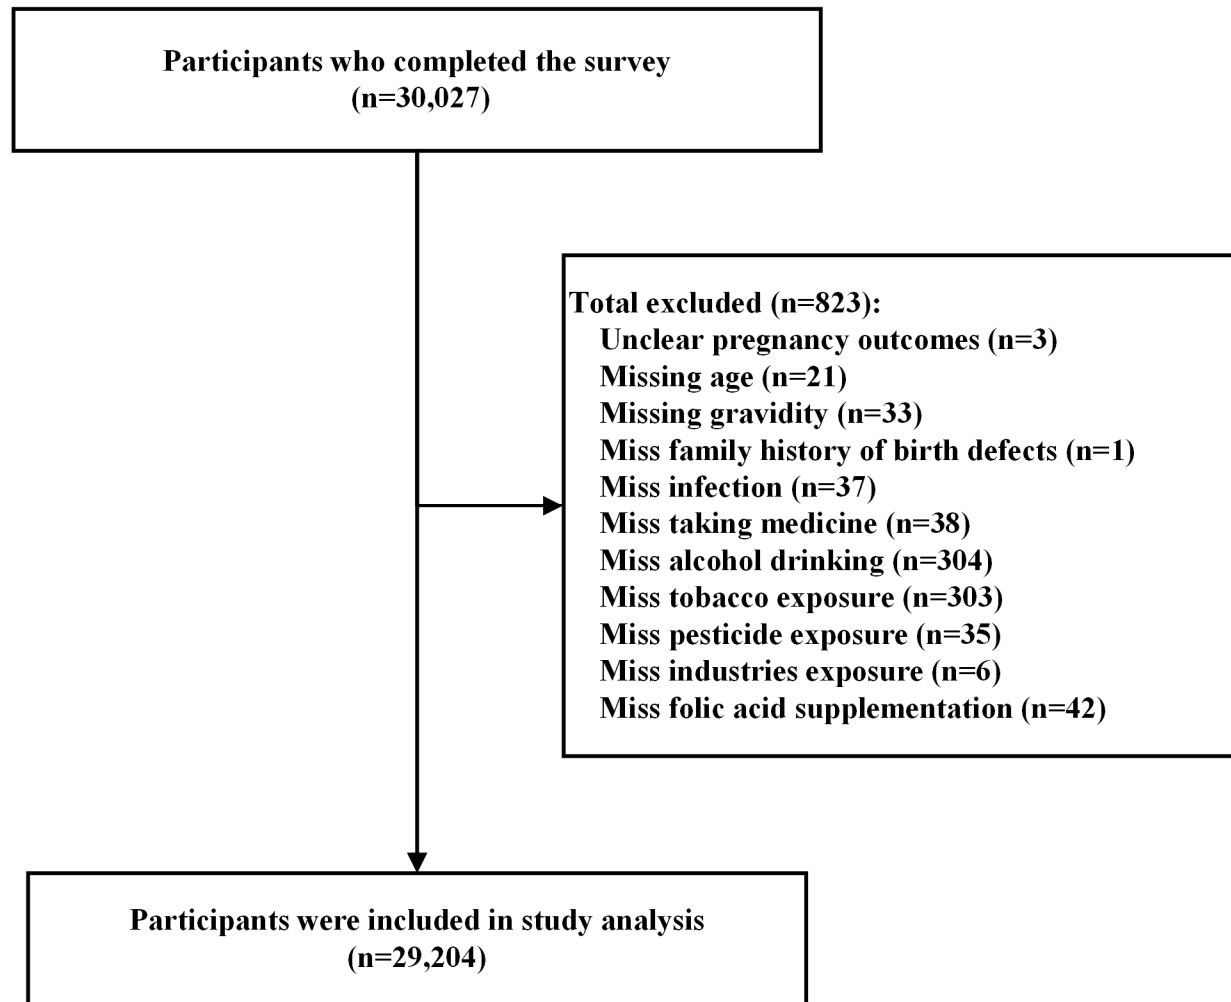

**Supplementary Figure S1.** Eligibility assessment with exclusion criteria.
